# Supplementary material
Source: PubMed Central journal article supplement (PMC4495208)
Supplement: AEM.00458-15_zam999116413so1.pdf [file AEM.00458-15_zam999116413so1.pdf]

## Supplemental Material

### **Involvement of Colonising *Bacillus* Isolates in Glucovanillin Hydrolysis during the Curing of *Vanilla planifolia* Andrews**

Running title: *Bacillus* Isolates in Glucovanillin Hydrolysis

Yonggan Chen, Fenglin Gu#, Jihua Li, Shuzhen He, Fei Xu, Yiming Fang

Y. Chen, F. Gu, S. He, F. Xu, Y. Fang

Spice and Beverage Research Institute, CATAS, Wanning 571533, China

Y. Chen

College of Food Science and Technology, Huazhong Agricultural University, Wuhan 430070, China

J. Li

Agricultural Product Processing Research Institute, CATAS, Zhanjiang 524001, China

Y. Chen, F. Gu, S. He, F. Xu, Y. Fang

Key Laboratory of Genetic Resources Utilization of Spice and Beverage Crops, Ministry of Agriculture, Wanning 571533, China

Address correspondence to Fenglin Gu, [xiaogu4117@163.com](mailto:xiaogu4117@163.com)

Tel: +86-898-62556090; fax: +86-898-62561083

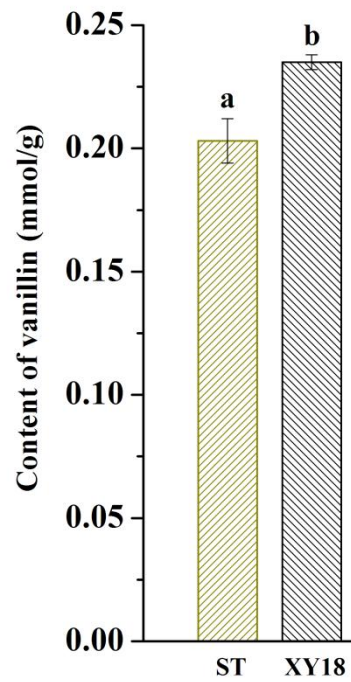

**Supplementary FIG S1.** Vanillin content of vanilla beans from the different curing process. ST, sterile beans cured by hot air processing. XY18, isolate XY18 assistance curing samples. The data obtained was subjected to  $t$  test. It was observed that there were highly significant ( $p < 0.05$ ) differences between the two samples.
